1 **Common facultative endosymbionts do not influence sensitivity of cereal**  
2 **aphids to pyrethroids**

3 D J Leybourne <sup>1\*</sup>

4 P Melloh <sup>1</sup>

5 E A Martin <sup>1</sup>

6 <sup>1</sup> Leibniz University Hannover, Institute of Geobotany, Zoological Biodiversity

7 \* Correspondence: [leybourne@geobotanik.uni-hannover.de](mailto:leybourne@geobotanik.uni-hannover.de)

8 **Abstract**

- 9 1. Cereal aphids, including the bird cherry-oat aphid, *Rhopalosiphum padi*, and the  
10 grain aphid, *Sitobion avenae*, can transmit viruses that significantly reduce crop  
11 yields. To mitigate against yield losses, insecticides are routinely used to manage  
12 aphid populations.
- 13 2. Aphids can form relationships with endosymbionts that confer fitness benefits or  
14 consequences to the aphid. Recent artificial inoculation experiments indicate that  
15 endosymbionts could increase aphid susceptibility to insecticides, but this has not  
16 been explored using aphid populations naturally infected with endosymbionts.
- 17 3. Here, we sampled aphids from an important cereal production region in Lower  
18 Saxony, Germany. We characterised the endosymbiont profile of these aphid  
19 populations and conducted pyrethroid dose-response assays to test the hypothesis  
20 that facultative endosymbionts increase aphid susceptibility to insecticides.
- 21 4. We find that the level of insecticide susceptibility is highly variable in *S. avenae* and  
22 we identify populations that are sensitive and tolerant to pyrethroids, including  
23 populations collected from the same field. For *R. padi*, we find evidence for  
24 decreased sensitivity to pyrethroids, representing the first report of reduced  
25 sensitivity to pyrethroids in *R. padi* sampled from Central Europe.
- 26 5. We detected high endosymbiont infection frequencies in the aphid populations. 84%  
27 of aphids carry one facultative endosymbiont and 9% of aphids carry two facultative  
28 endosymbionts. We detected associations with *Regiella insecticola*, *Fukatsia*  
29 *symbiotica*, and *Hamiltonella defensa*. However, we do not identify a link between  
30 endosymbiont infection and insecticide susceptibility, indicating that other factors  
31 may govern the development of insecticide resistance and the need for alternative  
32 management strategies.

## 33 Introduction

34 Cereal aphids, including the bird cherry-oat aphid, *Rhopalosiphum padi*, and the grain aphid,  
35 *Sitobion avenae*, are important herbivorous insects. Cereal aphids are classed as agricultural pest  
36 species on many grasses and cereals, including wheat and barley (Van Emden & Harrington,  
37 2017). Cereal aphids are widely distributed across Central Europe and can cause significant  
38 damage to cereal crops. Aphid damage can be caused through direct feeding (Dedryver *et al.*,  
39 2010) and via the transmission of plant viruses, including barley yellow dwarf virus (BYDV) (Perry  
40 *et al.*, 2000). High levels of BYDV infection in cereal crops can result in yield losses of c. 80%  
41 (Nancarrow *et al.*, 2021).

42 Insecticides remain the method that is most commonly used to manage aphid populations, with  
43 pyrethroids widely used for the management of cereal aphids on spring and winter cereal crops  
44 across Europe (Dewar & Foster, 2017). The high reliance on pyrethroid insecticides increases the  
45 evolutionary pressure on aphid populations, increasing the risk that insecticide resistant aphid  
46 populations will emerge (Dewar & Foster, 2017). Insecticide resistant populations can have  
47 devastating consequences on effective aphid management and increase potential aphid-derived  
48 yield loss (Dewar & Foster, 2017), making these an urgent priority for the development of  
49 alternative management strategies. Resistance to insecticides evolves over time, and monitoring  
50 surveys of herbivorous insect populations can detect the emergence of insecticide resistance by  
51 identifying populations that are less sensitive to insecticides (Umina *et al.*, 2020; Walsh *et al.*,  
52 2020a). Resistance against pyrethroids has been described in both *S. avenae* and *R. padi*  
53 populations (Foster *et al.*, 2014; Wang *et al.*, 2020). Pyrethroid resistance is associated with  
54 mutations in voltage-gated ion channels (Foster *et al.*, 2014; Wang *et al.*, 2020) and this resistance  
55 mechanism is referred to as *knock down resistance (kdr)*. Two mutations conferring *kdr* resistance  
56 have been described, namely *kdr* (Foster *et al.*, 2014) and *super-kdr* (Wang *et al.*, 2020).

57 Pyrethroid resistance has been described in *S. avenae* populations, with heterozygous *knockdown*  
58 *resistance (kdr-SR)* resistant populations detected in China, Ireland, and the UK (Foster *et al.*,  
59 2014; Walsh *et al.*, 2020b; Gong *et al.*, 2021). However, the composition of resistant populations is  
60 variable and appears to differ between survey years and across regions. Field surveys of *S.*  
61 *avenae* in Ireland indicate that the composition of individuals containing the *kdr-SR* heterozygous  
62 mutation can range from 25-54% (Walsh *et al.*, 2020b). Resistance against pyrethroids was  
63 recently reported in an *R. padi* population collected from Jingyang, Shaaxi Province, China (Wang  
64 *et al.*, 2020) and subsequent field surveys have detected additional pyrethroid-resistant  
65 populations in multiple locations across China (Gong *et al.*, 2021). According to the Arthropod  
66 Pesticide Resistance Database, a global databank of insecticide resistance cases, no other  
67 occurrences of pyrethroid resistance in *R. padi* have been reported. This indicates that full  
68 pyrethroid resistance is yet to evolve, or be detected, in *R. padi* populations outside of China.

69 The development of insecticide resistance can be monitored through dose-response assays to  
70 detect the emergence of populations showing reduced sensitivity to insecticides. *R. padi*  
71 populations with reduced sensitivity to pyrethroids have been recently detected in Ireland (Walsh *et al.*  
72 *et al.*, 2020a) and Australia (Umina *et al.*, 2020), suggesting that resistance could be evolving.  
73 However, on average, field concentrations of pyrethroids are still effective at controlling over 90%  
74 of the aphid population (Zuo *et al.*, 2016; Umina *et al.*, 2020; Walsh *et al.*, 2020a).

75 The lack of high prevalence of resistant populations across regions and years (Walsh *et al.*, 2020b;  
76 Gong *et al.*, 2021) suggests that fitness consequences could be associated with insecticide  
77 resistance traits. Recent research has provided some evidence to support this: it was recently  
78 reported that *S. avenae* populations with heterozygous *kdr-SR* resistance to pyrethroids exhibit  
79 increased vulnerability to the parasitoid *Aphidius ervi* (Jackson *et al.*, 2020). Studies have also

80 identified additional fitness trade-offs resulting from *kdr*-SR heterozygous resistance to pyrethroids,  
81 including lower aphid abundance and reduced growth in *S. avenae* populations (Jackson *et al.*,  
82 2020) and reduced fecundity in *R. padi* populations carrying *super-kdr* resistance (Wang *et al.*,  
83 2021).

84 A key driver of phenotypic diversity in aphid populations is the presence of facultative  
85 endosymbionts (Zytynska & Weisser, 2016; Zytynska *et al.*, 2021). The majority of aphid species  
86 form an essential relationship with the endosymbiont *Buchnera aphidicola*, with *B. aphidicola*  
87 providing nutritional supplementation to the aphid diet (Sasaki *et al.*, 1991; Douglas & Prosser,  
88 1992). Aphids can also form non-essential, or facultative, relationships with a range of additional  
89 endosymbionts (Zytynska & Weisser, 2016; Guo *et al.*, 2017). The most common facultative  
90 endosymbionts detected in aphid populations are *Spiroplasma spp.*, *Regiella insecticola*,  
91 *Hamiltonella defensa*, *Rickettsiella sp.*, *Fukatsia symbiotica* (previously pea aphid x-type symbiont,  
92 PAXS), *Serratia symbiotica*, *Rickettsia spp.*, and *Arsenophonus spp.* (Zytynska & Weisser, 2016;  
93 Guo *et al.*, 2017; Beekman *et al.*, 2022). These facultative endosymbiotic relationships occur  
94 naturally in aphid populations (Henry *et al.*, 2015; Guo *et al.*, 2019; Leybourne *et al.*, 2020a;  
95 Beekman *et al.*, 2022). The phenotypic consequence of endosymbiont infection is not always clear,  
96 and the phenotypic traits conferred by a specific endosymbiont species are not consistently  
97 observed between aphid species, aphid genotypes within the same species, or even between  
98 different endosymbiont strains (Vorburger *et al.*, 2010; Cayetano *et al.*, 2015; McLean & Godfray,  
99 2015; Oliver & Higashi, 2019). One common beneficial trait that is often conferred through  
100 facultative endosymbiont infection across a range of aphid-endosymbiont combinations is  
101 resistance against parasitoid wasps (Oliver *et al.*, 2003, 2009; Asplen *et al.*, 2014; Leybourne *et al.*,  
102 2020a). A diverse range of other phenotypic traits that can be conferred by endosymbiont infection  
103 have also been described, including lower fecundity (Zytynska *et al.*, 2021).

104 In cereal aphids, endosymbiont-conferred phenotypes include protection against parasitoid wasps  
105 (Leybourne *et al.*, 2020a), altered feeding behaviour (Leybourne *et al.*, 2020b), adjusted life-history  
106 parameters, including reduced growth and development (Liu *et al.*, 2019; Leybourne *et al.*, 2020a;  
107 Luo *et al.*, 2020), and moderate increase in susceptibility to bacterial pathogens (Álvarez-Lagazzi  
108 *et al.*, 2021). Recently, studies have indicated that endosymbiont infection can also influence the  
109 susceptibility of the aphid host to insecticides. A study examining aphid susceptibility to a range of  
110 insecticides found that wheat aphids, *S. miscanthi*, infected with *H. defensa* were more susceptible  
111 to low concentrations of insecticide when compared with uninfected aphids (Li *et al.*, 2021). This  
112 indicates that there could be a phenotypic link between facultative endosymbiont communities and  
113 aphid susceptibility, or tolerance, to insecticides. An association between endosymbiont infection  
114 and insecticide resistance could provide an explanation for high variation in endosymbiont  
115 prevalence and *kdr*-SR prevalence in aphid populations (Guo *et al.*, 2019; Walsh *et al.*, 2020b).

116 Here, we report the results of pyrethroid dose-response bio-assays for cereal aphid populations  
117 sampled from a key cereal production region in Northern Germany. We sampled 25 *S. avenae* and  
118 seven *R. padi* populations from 13 field sites. We find that, for *S. avenae*, the level of insecticide  
119 susceptibility is highly variable, with populations sensitive and tolerant to pyrethroid exposure,  
120 including populations collected from the same field. In *R. padi* populations, we find evidence for  
121 decreased sensitivity, indicating that resistance to pyrethroids is starting to evolve in German *R.*  
122 *padi* populations. Furthermore, we explore the hypothesis that endosymbiont infection increases  
123 aphid susceptibility to insecticides by characterising the endosymbiont communities of these  
124 populations.

## 125 **Methods**

### 126 ***Aphid populations and sampling***

127 Cereal aphid populations were sampled in summer and autumn 2021 from 13 agricultural fields in  
128 Lower Saxony, Germany (Fig. 1). Sample sites comprised 12 winter cereal fields (collected in  
129 summer) and one winter rapeseed field (collected in autumn). Single adult aphids (apterous or  
130 alate) were collected and used to establish laboratory populations; from the 13 fields 25 *Sitobion*  
131 *avenae* and seven *Rhopalosiphum padi* populations were established. Populations were  
132 maintained on one-week old wheat plants (approximately GS 11-13) in ventilated plastic cups  
133 under glasshouse conditions. Where multiple samples were collected from one field the samples  
134 were either collected on different dates or with a 20 m minimum distance between sampling points.

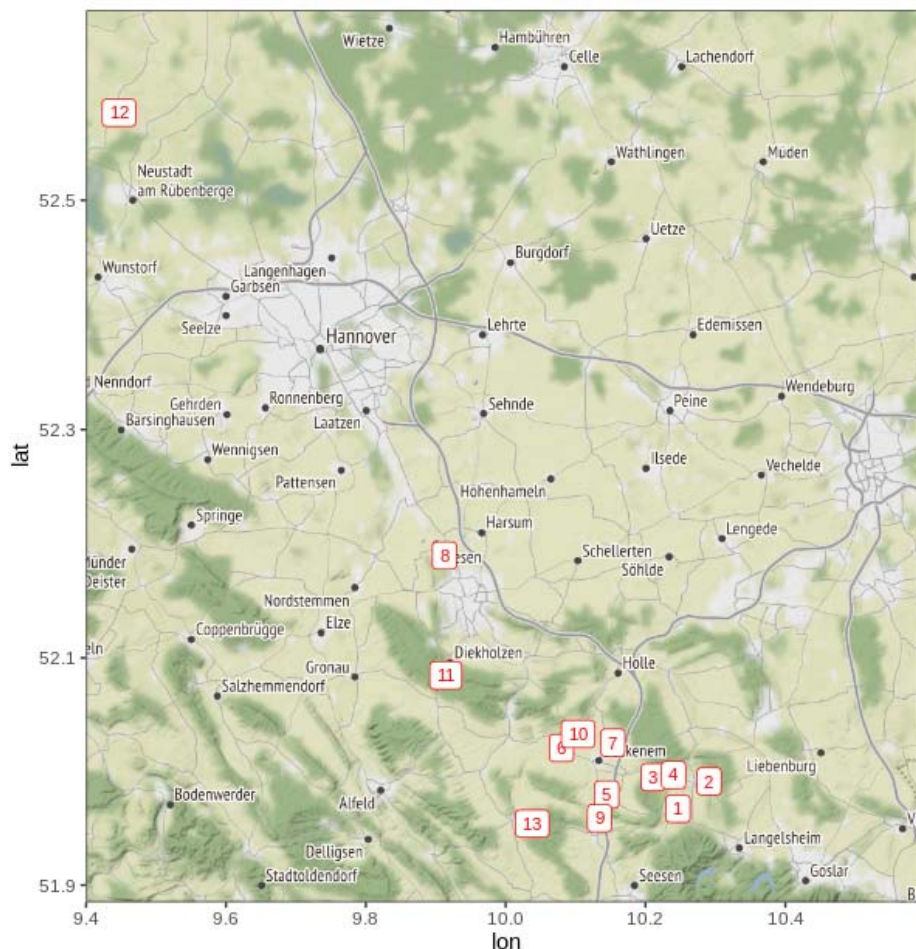

135  
136 **Fig. 1:** Location of the 13 sample sites. Field 12 was a winter rapeseed field, all other fields were winter  
137 wheat

### 138 ***Insecticide sensitivity testing***

139 Aphid populations were screened for susceptibility and sensitivity to the synthetic pyrethroid Decis  
140 Forte® (Bayer CropScience, Germany), a Class 3A synthetic pyrethroid (active ingredient  
141 deltamethrin at 100 g L<sup>-1</sup> formulation). This insecticide was selected as it is approved for use on  
142 arable and field crops in Germany. A stock solution was prepared in water at a concentration  
143 comparable to the recommended field rate, equating to a concentration of 357 mg a.i. L<sup>-1</sup>. Serial  
144 dilutions were prepared from the stock solution. Five insecticide dilutions were used in the assay:  
145 stock, 10<sup>-1</sup>, 10<sup>-2</sup>, 10<sup>-3</sup>, 10<sup>-4</sup>, with distilled water included as a negative control.

146 The insecticide sensitivity assays broadly followed the IRAC leaf-dip method (IRAC, 2016) and the  
147 method deployed by (Umina *et al.*, 2020). Briefly, *c.* 25 mm sections of wheat leaves were  
148 submerged for *c.* 10 s in one of the test solutions. Control leaves were dipped first, then the leaves

149 were dipped sequentially from the lowest concentration ( $10^{-4}$ ) to the field rate stock solution. Once  
150 dipped, leaves were left to dry on paper towels for approximately 1 h before they were placed  
151 abaxial side up on agar ( $1 \text{ g L}^{-1}$ ) in a plastic Petri Dish; a droplet of water was added to the surface  
152 of the agar to aid leaf adhesion. Aphids were transferred to each Petri Dish using a fine-haired  
153 paintbrush, Petri Dishes were moved to a controlled environment room ( $20^{\circ}\text{C} \pm 2^{\circ}\text{C}$ , L16:D8), and  
154 Petri Dishes were inverted to simulate aphid feeding from the underside of the leaf. Between 4 – 8  
155 aphids were transferred to each Petri Dish. After 48 h aphids were scored as either alive,  
156 moribund, or dead. Aphids were classed as alive if they were able to return to an upright position  
157 when placed on their back (i.e., they were capable of coordinated movement). Moribund and dead  
158 aphids were grouped together as “affected”, in-line with previous dose-response assays (Foster *et*  
159 *al.*, 2012; Umina *et al.*, 2020).

### 160 **DNA extraction and diagnostic PCR for endosymbiont characterisation**

161 A sample of five aphids (mixture of apterous adults and nymphs) were collected from each  
162 population and DNA was extracted using the Norgen® Plant and Fungi DNA extraction kit (Norgen  
163 Biotek, Germany) following manufacturer’s instructions. An extraction blank was included with each  
164 batch of extractions.

165 Successful DNA extraction was confirmed using a PCR marker for the primary aphid symbiont  
166 *Buchnera aphidicola*. The presence of facultative endosymbionts was determined using a three-  
167 step multiplex diagnostic PCR assay (Beekman *et al.*, 2022). Multiplex assays were used to detect  
168 the presence of the main aphid secondary endosymbionts: *Spiroplasma spp.*, *Regiella insecticola*,  
169 *Hamiltonella defensa*, *Rickettsiella sp.*, *Fukatsuiia symbiotica*, *Serratia symbiotica*, *Rickettsia spp.*,  
170 and *Arsenophonus spp.* All PCR primer details are described in Table S1. PCR assays were  
171 conducted in a final reaction volume of 12  $\mu\text{L}$  consisting of: 2  $\mu\text{L}$  DNA, 6  $\mu\text{L}$  2X Kappa2G Fast PCR  
172 Ready Mix (Merck, Germany). Primer concentrations and volumes differed between the multiplex  
173 assays and are detailed in Table S1. The final reaction mixture was made to 12  $\mu\text{L}$  using nuclease-  
174 free DEPC-treated water (CarlRoth, Germany). PCR conditions followed Beekman *et al.*, 2022, i.e.:  
175 denaturation at  $94^{\circ}\text{C}$  for 3 min followed by 35 cycles of  $94^{\circ}\text{C}$  for 30 s,  $58^{\circ}\text{C}$  for 30 s, and  $72^{\circ}\text{C}$  for  
176 60 s with a final extension step at  $72^{\circ}\text{C}$  for 10 min. Positive DNA (mixed DNA containing positive  
177 DNA extracts for all target endosymbionts) was included as a positive control, an extraction blank  
178 was used as an extraction negative control, and DNA-free PCR mastermix was included as PCR  
179 negative control. Endosymbiont presence was detected by separation of PCR products on a 1%  
180 agarose gel stained with GelRed® (Biotium, Germany), and reactions were visualised under UV  
181 light; a 100 bp DNA ladder (ThermoFischer, Germany) was used to estimate band size. Positive  
182 identification of the presence of endosymbionts in the multiplex assay were confirmed in additional  
183 singleplex assays. All PCR assays were conducted in a Biometra TRIO 48, Thermocycler (Analytik  
184 Jena, Germany).

### 185 **Statistical analysis**

186 All statistical analysis was carried out using R (v.4.1.2) and R Studio (v.1.3.1093). The estimated  
187 concentration of active ingredient required to achieve 50% mortality ( $\text{EC}_{50}$  value),  $\text{EC}_{50}$  95%  
188 confidence intervals, slope, intercept, and associated standard errors for the dose response curve  
189 were calculated for each aphid population using probit estimation regression (Finney, 1952). To  
190 achieve this, the “ProbitEPA” function in the R package ecotoxicology (v.1.0.1) was used.  
191 Differences in the dose response between populations was detected using an ANOVA, as done in  
192 similar studies (Umina *et al.*, 2020); to achieve this the intercepts of the dose response curves  
193 were estimated using linear models with aphid population, facultative endosymbiont infection  
194 status, and facultative endosymbiont diversity (Simpson’s diversity) included as explanatory  
195 variables in individual models. Linear models were tested for significance using Type-II ANOVA.

196 Simpson's diversity was calculated using the vegan package (v.2.5-7). Where significant  
 197 differences in model intercepts were detected, the differing aphid populations were identified by  
 198 observing the overlapping confidence intervals. This method has been used previously to identify  
 199 differences in insecticide susceptibility between aphid populations from estimated concentration of  
 200 active ingredient required to achieve 50% population mortality ( $EC_{50}$ ) values (Foster *et al.*, 2012).

## 201 Results

### 202 *Pyrethroid sensitivity is variable in Sitobion avenae populations*

203 Based on mortality at field rate concentration (i.e., mortality in the stock treatment, 357 mg a.i. L<sup>-1</sup>  
 204 deltamethrin), *S. avenae* populations were grouped into four broad categories (Table 1):  
 205 Susceptible (mortality at field concentration 95-100%), moderately susceptible (mortality at field  
 206 concentration 90-94%), moderately tolerant (mortality at field concentration 71-89%), and tolerant  
 207 (mortality at field concentration  $\leq$  70%). Field rate concentration only achieved complete aphid  
 208 control in five of the 25 *S. avenae* populations, namely populations SA3, SA-5, SA-6, SA-11, and  
 209 SA-23 (Fig. 2). Three *S. avenae* populations (SA-13, SA-15, SA-16) showed tolerance to  
 210 pyrethroid exposure, with  $\leq$  70% population mortality following exposure to field rate concentrations  
 211 of deltamethrin (Fig. 2; Table 1).

212 The estimated effective dose required for 50% population control ( $EC_{50}$ ) ranged from 0.38 mg a.i.  
 213 L<sup>-1</sup> to 190.08 mg a.i. L<sup>-1</sup> deltamethrin (Table 1). Comparison of the dose response model intercepts  
 214 highlighted differences in  $EC_{50}$  amongst the *S. avenae* populations examined ( $F_{24,92} = 4.16$ ;  $p =$   
 215  $<0.001$ ). Observation of the overlapping 95% confidence intervals (Fig. 2; Table 1) indicates that  
 216 differences in  $EC_{50}$  are between the three tolerant populations (SA-13, SA-15, SA-16) and seven of  
 217 the ten susceptible populations (SA-1, SA-3, SA-4, SA-5, SA-6, SA-11, SA-23).

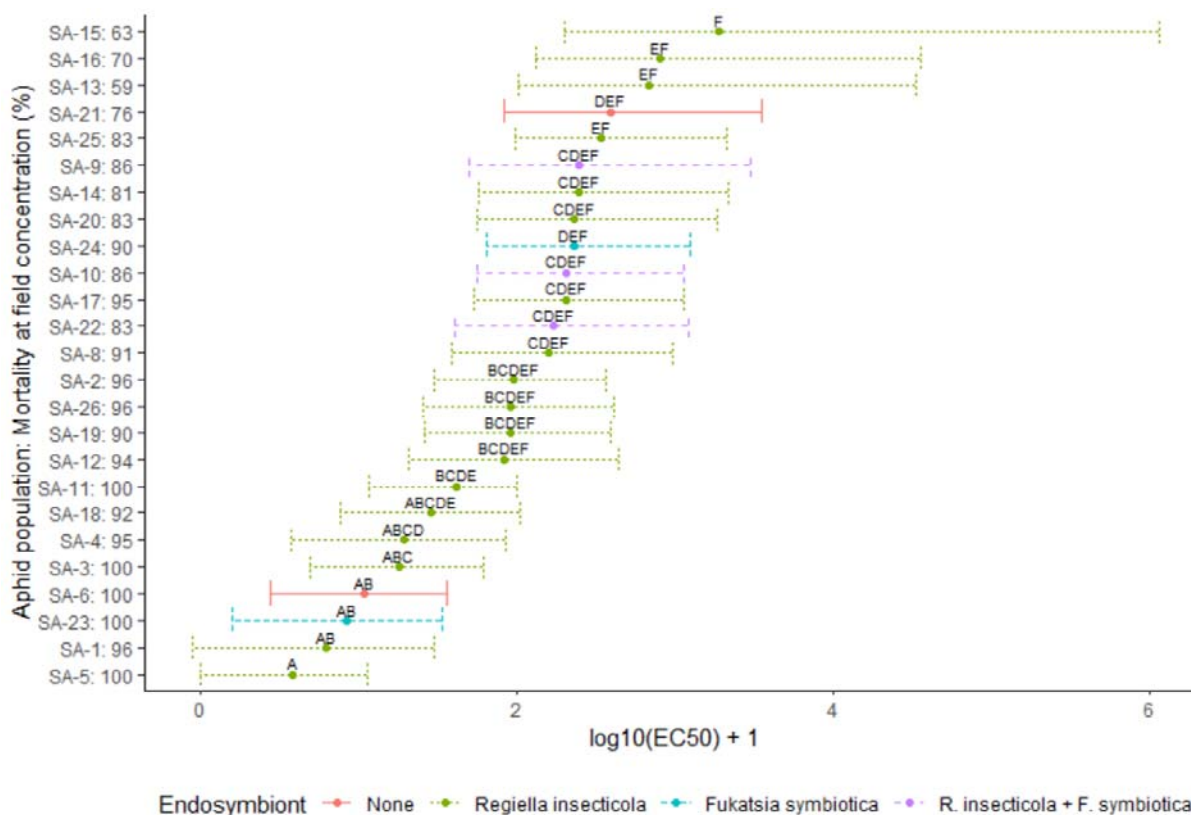

218

219 **Fig. 2:** Estimated  $EC_{50}$  values and 95% confidence intervals for *Sitobion avenae* populations.  $EC_{50}$  values  
 220 are shown on the  $\log_{10}+1$  scale to aid interpretation. Aphid population on the y-axis is followed by the

7

221 percentage population control at field rate concentration. Letters indicate differences between the aphid  
222 populations based on overlapping confidence intervals.  
223  
224  
225

226 **Table 1: Insecticide bio-assay results**

| Clone name             | Species          | Field | Week sampled | Number tested | Slope coefficient (±SE) | EC <sub>50</sub> (mg a.i. L <sup>-1</sup> ) | 95% confidence interval | Resistance Category    |
|------------------------|------------------|-------|--------------|---------------|-------------------------|---------------------------------------------|-------------------------|------------------------|
| SA-1 <sup>AB</sup>     | <i>S. avenae</i> | 6     | 21.06.2021   | 153           | 0.50 (0.08)             | 0.62                                        | 0.09 – 3.00             | Susceptible            |
| SA-2 <sup>BCDEF</sup>  | <i>S. avenae</i> | 5     | 21.06.2021   | 173           | 0.70 (0.18)             | 9.59                                        | 2.99 – 36.71            | Susceptible            |
| SA-3 <sup>AB</sup>     | <i>S. avenae</i> | 1     | 21.06.2021   | 126           | 0.89 (0.11)             | 1.81                                        | 0.49 – 6.11             | Susceptible            |
| SA-4 <sup>ABCD</sup>   | <i>S. avenae</i> | 7     | 21.06.2021   | 123           | 0.67 (0.11)             | 1.91                                        | 0.37 – 8.57             | Susceptible            |
| SA-5 <sup>A</sup>      | <i>S. avenae</i> | 10    | 21.06.2021   | 168           | 0.79 (0.09)             | 0.38                                        | 0.10 – 1.13             | Susceptible            |
| SA-6 <sup>AB</sup>     | <i>S. avenae</i> | 2     | 21.06.2021   | 174           | 0.66 (0.18)             | 1.09                                        | 0.28 – 3.64             | Susceptible            |
| SA-8 <sup>CDEF</sup>   | <i>S. avenae</i> | 5     | 21.06.2021   | 124           | 0.69 (0.15)             | 15.67                                       | 3.84 – 96.17            | Moderately Susceptible |
| SA-9 <sup>CDEF</sup>   | <i>S. avenae</i> | 1     | 21.06.2021   | 126           | 0.57 (0.38)             | 24.62                                       | 5.03 – 295.95           | Moderately Tolerant    |
| SA-10 <sup>CDEF</sup>  | <i>S. avenae</i> | 1     | 21.06.2021   | 176           | 0.60 (0.33)             | 20.39                                       | 5.64 – 114.40           | Moderately Tolerant    |
| SA-11 <sup>BCDE</sup>  | <i>S. avenae</i> | 7     | 21.06.2021   | 192           | 1.05 (0.18)             | 4.14                                        | 1.17 – 10.04            | Susceptible            |
| SA-12 <sup>BCDEF</sup> | <i>S. avenae</i> | 3     | 21.06.2021   | 192           | 0.51 (0.28)             | 8.26                                        | 2.09 – 43.62            | Moderately Susceptible |
| SA-13 <sup>EF</sup>    | <i>S. avenae</i> | 6     | 21.06.2021   | 174           | 0.38 (0.09)             | 68.56                                       | 10.19 – 3319.38         | Tolerant               |
| SA-14 <sup>CDEF</sup>  | <i>S. avenae</i> | 6     | 21.06.2021   | 192           | 0.48 (0.12)             | 24.52                                       | 5.75 – 215.58           | Moderately Tolerant    |
| SA-15 <sup>F</sup>     | <i>S. avenae</i> | 7     | 21.06.2021   | 144           | 0.38 (0.10)             | 190.08                                      | 19.80 – 11356.90        | Tolerant               |
| SA-16 <sup>EF</sup>    | <i>S. avenae</i> | 7     | 21.06.2021   | 156           | 0.45 (0.11)             | 80.53                                       | 13.31 – 3572.30         | Tolerant               |
| SA-17 <sup>CDEF</sup>  | <i>S. avenae</i> | 9     | 21.06.2021   | 126           | 0.75 (0.16)             | 20.29                                       | 5.39 – 114.46           | Susceptible            |
| SA-18 <sup>ABCDE</sup> | <i>S. avenae</i> | 3     | 21.06.2021   | 156           | 0.69 (0.08)             | 2.86                                        | 0.77 – 10.34            | Moderately Susceptible |
| SA-19 <sup>BCDEF</sup> | <i>S. avenae</i> | 7     | 21.06.2021   | 174           | 0.63 (0.30)             | 9.08                                        | 2.60 – 39.21            | Moderately Susceptible |
| SA-20 <sup>CDEF</sup>  | <i>S. avenae</i> | 3     | 21.06.2021   | 174           | 0.53 (0.17)             | 23.01                                       | 5.57 – 184.19           | Moderately Tolerant    |
| SA-21 <sup>DEF</sup>   | <i>S. avenae</i> | 3     | 05.07.2021   | 126           | 0.59 (0.13)             | 39.30                                       | 8.27 – 573.09           | Moderately Tolerant    |
| SA-22 <sup>CDEF</sup>  | <i>S. avenae</i> | 9     | 21.06.2021   | 174           | 0.52 (0.17)             | 16.87                                       | 4.07 – 120.94           | Moderately Tolerant    |
| SA-23 <sup>AB</sup>    | <i>S. avenae</i> | 13    | 21.06.2021   | 149           | 0.62 (0.18)             | 0.85                                        | 0.16 – 3.33             | Susceptible            |
| SA-24 <sup>DEF</sup>   | <i>S. avenae</i> | 6     | 05.07.2021   | 173           | 0.63 (0.19)             | 22.71                                       | 6.49 – 123.98           | Moderately Susceptible |
| SA-25 <sup>EF</sup>    | <i>S. avenae</i> | 9     | 21.06.2021   | 174           | 0.63 (0.64)             | 33.94                                       | 9.74 – 209.92           | Moderately Tolerant    |
| SA-26 <sup>BCDEF</sup> | <i>S. avenae</i> | 12    | 04.10.2021   | 170           | 0.63 (0.13)             | 9.15                                        | 2.57 – 41.39            | Susceptible            |
| RP-1 <sup>ZY</sup>     | <i>R. padi</i>   | 2     | 21.06.2021   | 189           | 0.81 (0.07)             | 1.13                                        | 0.37 – 3.11             | Susceptible            |
| RP-2 <sup>ZY</sup>     | <i>R. padi</i>   | 5     | 05.07.2021   | 192           | 0.73 (0.10)             | 1.55                                        | 0.49 – 4.54             | Susceptible            |
| RP-3 <sup>Z</sup>      | <i>R. padi</i>   | 5     | 21.06.2021   | 189           | 0.66 (0.15)             | 0.44                                        | 0.11 – 1.40             | Susceptible            |
| RP-4 <sup>ZY</sup>     | <i>R. padi</i>   | 11    | 21.06.2021   | 192           | 0.63 (0.18)             | 1.41                                        | 0.39 – 4.63             | Susceptible            |
| RP-5 <sup>Y</sup>      | <i>R. padi</i>   | 13    | 21.06.2021   | 192           | 1.50 (0.11)             | 5.32                                        | 2.51 – 11.29            | Susceptible            |
| RP-6 <sup>ZY</sup>     | <i>R. padi</i>   | 4     | 21.06.2021   | 187           | 0.82 (0.09)             | 1.63                                        | 0.55 – 4.55             | Susceptible            |
| RP-7 <sup>ZY</sup>     | <i>R. padi</i>   | 4     | 05.07.2021   | 192           | 0.78 (0.07)             | 2.03                                        | 0.69 – 5.69             | Susceptible            |

227 The EC<sub>50</sub> values for populations followed by the same letter do not differ significantly, based on observation of overlapping confidence  
 228 intervals (Foster *et al.*, 2011). Populations have been allocated a resistance category based on the observed mortality (% aphids  
 229 affected) at the field concentration (375 mg a.i. / L) treatment: Susceptible (95-100% mortality), moderately susceptible (90-94%  
 230 mortality), moderately tolerant (71-89% mortality), tolerant (≤ 70% mortality).



232 **Decreased pyrethroid sensitivity in a *Rhopalosiphum padi* population collected from**  
233 **Germany**

234 Based on mortality at field rate concentration, all *R. padi* populations were categorised as  
235 susceptible to deltamethrin (mortality >95%; Table 2; Fig. 3); however, two populations (RP-5 and  
236 RP-6) had a reduced mortality of 96% (Fig. 3).

237 The estimated effective dose required for 50% population control ( $EC_{50}$ ) ranged from 0.44 mg a.i.  
238  $L^{-1}$  to 5.32 mg a.i.  $L^{-1}$  deltamethrin (Table 1). Comparison of model intercepts highlighted  
239 differences in  $EC_{50}$  amongst the *R. padi* populations examined ( $F_{6,27} = 7.43$ ;  $p = <0.001$ ).  
240 Observation of the overlapping 95% confidence intervals (Fig. 3; Table 1) indicates that differences  
241 in  $EC_{50}$  are between one of the populations with reduced mortality, RP-5, and the susceptible  
242 population RP-3 (Fig. 3; Table 1).

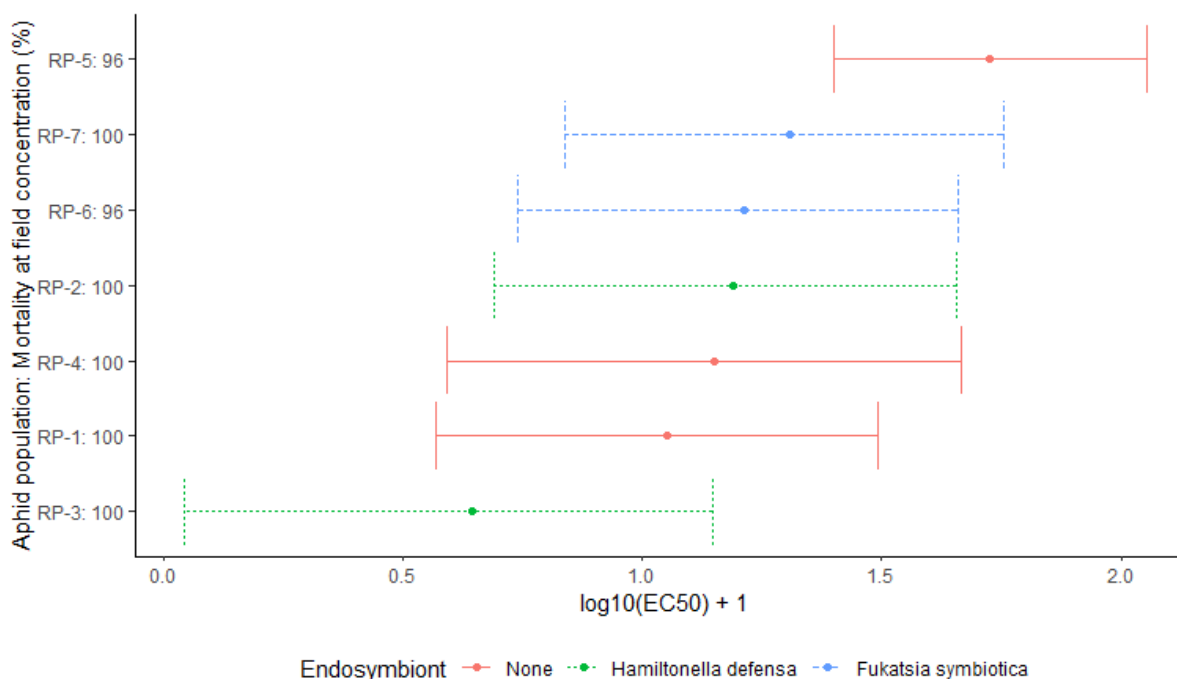

243

244 **Fig. 3:** Estimated  $EC_{50}$  values and 95% CI for *Rhopalosiphum padi* populations.  $EC_{50}$  values are shown on  
245 the  $\log_{10}+1$  scale to aid interpretation. Aphid population on the y-axis is followed by the percentage  
246 population control at field rate concentration.

247 **Facultative endosymbionts occur at high frequencies in aphid populations but they**  
248 **do not influence pyrethroid sensitivity**

249 Of the 32 aphid populations 27 were infected with at least one facultative endosymbiont (Table 2).  
250 The endosymbiont community differed between the two cereal aphid species: endosymbionts were  
251 detected in 92% of *S. avenae* populations and 57% of *R. padi* populations (Table 2). In *S. avenae*  
252 endosymbiont communities were dominated by *R. insecticola*, with *R. insecticola* present in 72% of  
253 *S. avenae* populations. Low levels of infection with *F. symbiotica* (8%) and co-infection of *R.*  
254 *insecticola* and *F. symbiotica* (12%) were detected in the *S. avenae* populations. For *R. padi*, the  
255 defensive endosymbiont *H. defensa* was detected in 28% of the populations and *F. symbiotica* was  
256 detected in 28% of the populations. For both aphid species, neither endosymbiont infection status  
257 nor endosymbiont diversity influenced aphid sensitivity to deltamethrin: *S. avenae* facultative  
258 endosymbiont infection status ( $F_{1,23} = 0.37$ ;  $p = 0.778$ ; Fig. 2) and diversity ( $F_{1,23} = 0.06$ ;  $p = 0.816$ ),  
259 *R. padi* facultative endosymbiont infection status ( $F_{2,4} = 0.65$ ;  $p = 0.569$ ; Fig. 3) and diversity  $F_{2,4} =$   
260 1.11;  $p = 0.341$ ).

261 **Table 2:** Endosymbiont profiles of the 32 aphid populations

| Clone name | Species          | <i>B.a</i><br>(primary) | <i>Spi</i> | <i>R.i.</i> | <i>H.d.</i> | <i>R-siella</i> | <i>F. s.</i> | <i>S.s.</i> | <i>R-tsia</i> | <i>Ars.</i> |
|------------|------------------|-------------------------|------------|-------------|-------------|-----------------|--------------|-------------|---------------|-------------|
| SA-1       | <i>S. avenae</i> | +                       | -          | +           | -           | -               | -            | -           | -             | -           |
| SA-2       | <i>S. avenae</i> | +                       | -          | +           | -           | -               | -            | -           | -             | -           |
| SA-3       | <i>S. avenae</i> | +                       | -          | +           | -           | -               | -            | -           | -             | -           |
| SA-4       | <i>S. avenae</i> | +                       | -          | +           | -           | -               | -            | -           | -             | -           |
| SA-5       | <i>S. avenae</i> | +                       | -          | +           | -           | -               | -            | -           | -             | -           |
| SA-6       | <i>S. avenae</i> | +                       | -          | -           | -           | -               | -            | -           | -             | -           |
| SA-8       | <i>S. avenae</i> | +                       | -          | +           | -           | -               | -            | -           | -             | -           |
| SA-9       | <i>S. avenae</i> | +                       | -          | +           | -           | -               | +            | -           | -             | -           |
| SA-10      | <i>S. avenae</i> | +                       | -          | +           | -           | -               | +            | -           | -             | -           |
| SA-11      | <i>S. avenae</i> | +                       | -          | +           | -           | -               | -            | -           | -             | -           |
| SA-12      | <i>S. avenae</i> | +                       | -          | +           | -           | -               | -            | -           | -             | -           |
| SA-13      | <i>S. avenae</i> | +                       | -          | +           | -           | -               | -            | -           | -             | -           |
| SA-14      | <i>S. avenae</i> | +                       | -          | +           | -           | -               | -            | -           | -             | -           |
| SA-15      | <i>S. avenae</i> | +                       | -          | +           | -           | -               | -            | -           | -             | -           |
| SA-16      | <i>S. avenae</i> | +                       | -          | +           | -           | -               | -            | -           | -             | -           |
| SA-17      | <i>S. avenae</i> | +                       | -          | +           | -           | -               | -            | -           | -             | -           |
| SA-18      | <i>S. avenae</i> | +                       | -          | +           | -           | -               | -            | -           | -             | -           |
| SA-19      | <i>S. avenae</i> | +                       | -          | +           | -           | -               | -            | -           | -             | -           |
| SA-20      | <i>S. avenae</i> | +                       | -          | +           | -           | -               | -            | -           | -             | -           |
| SA-21      | <i>S. avenae</i> | +                       | -          | -           | -           | -               | -            | -           | -             | -           |
| SA-22      | <i>S. avenae</i> | +                       | -          | +           | -           | -               | +            | -           | -             | -           |
| SA-23      | <i>S. avenae</i> | +                       | -          | -           | -           | -               | +            | -           | -             | -           |
| SA-24      | <i>S. avenae</i> | +                       | -          | -           | -           | -               | +            | -           | -             | -           |
| SA-25      | <i>S. avenae</i> | +                       | -          | +           | -           | -               | -            | -           | -             | -           |
| SA-26      | <i>S. avenae</i> | +                       | -          | +           | -           | -               | -            | -           | -             | -           |
| RP-1       | <i>R. padi</i>   | +                       | -          | -           | -           | -               | -            | -           | -             | -           |
| RP-2       | <i>R. padi</i>   | +                       | -          | -           | +           | -               | -            | -           | -             | -           |
| RP-3       | <i>R. padi</i>   | +                       | -          | -           | +           | -               | -            | -           | -             | -           |
| RP-4       | <i>R. padi</i>   | +                       | -          | -           | -           | -               | -            | -           | -             | -           |
| RP-5       | <i>R. padi</i>   | +                       | -          | -           | -           | -               | -            | -           | -             | -           |
| RP-6       | <i>R. padi</i>   | +                       | -          | -           | -           | -               | +            | -           | -             | -           |
| RP-7       | <i>R. padi</i>   | +                       | -          | -           | -           | -               | +            | -           | -             | -           |

262 Symbiont abbreviations: *B.a* (*B. aphidicola*; essential primary endosymbiont), *Spi* (*Spiroplasma* spp.), *R.i.* (*Regiella insecticola*), *H.d.*  
 263 (*Hamiltonella defensa*), *R-siella* (*Rickettsiella* sp.), *F.s.* (*Fukatsia symbiotica*), *S.s.* (*Serratia symbiotica*), *R-tsia* (*Rickettsia* spp.), and *Ars.*  
 264 (*Arsenophonus* spp).

## 265 Discussion

266 Our results provide insecticide dose-response data for 32 aphid populations against a synthetic  
 267 pyrethroid approved for aphid management in arable crops in Germany. We observe wide variation  
 268 in dose-response amongst the 25 *S. avenae* populations and we detect reduced sensitivity to  
 269 deltamethrin in one of the *R. padi* populations tested. We detect natural infection with the  
 270 facultative endosymbionts *R. insecticola* in *S. avenae*, *H. defensa* in *R. padi*, and *F. symbiotica* in  
 271 both species, including co-infection of *R. insecticola* and *F. symbiotica* in a subset of *S. avenae*  
 272 populations.

273 For the *S. avenae* populations we detected variable response to pyrethroid exposure, with EC<sub>50</sub>  
 274 values ranging from 0.38 mg a.i. L<sup>-1</sup> to 190.08 mg a.i. L<sup>-1</sup>. This wide variation in dose response in *S.*  
 275 *avenae* indicates that our *S. avenae* populations comprise individuals that are highly sensitive to  
 276 pyrethroids, tolerant to pyrethroids, and populations with intermediate susceptibilities. Indeed, the

277 low  $EC_{50}$  value of 0.38 mg a.i.  $L^{-1}$  detected in SA-5 is comparable with  $EC_{50}$  values in *S. avenae*  
278 populations that are sensitive to pyrethroid exposure (0.50 mg Bifenthrin  $L^{-1}$ ; 2.40 mg Beta-  
279 cypermethrin  $L^{-1}$ ; Gong *et al.*, 2021) and the high  $EC_{50}$  values estimated for the three tolerant  
280 populations, SA-15 (190.08 mg a.i.  $L^{-1}$ ), SA-16 (80.53 mg a.i.  $L^{-1}$ ), SA-13 (68.56 mg a.i.  $L^{-1}$ ), are  
281 similar to the  $EC_{50}$  values reported for *S. avenae* populations tolerant to pyrethroids, including  
282 those that harbour heterozygous *kdr*-SR resistance (Foster *et al.*, 2014; Walsh *et al.*, 2020a; Gong  
283 *et al.*, 2021). Our field survey also indicates that pyrethroid susceptibility is highly variable between  
284 populations collected from the same field. We sampled five *S. avenae* populations from field 7 and  
285 the estimated  $EC_{50}$  for these populations ranged from 1.91 mg a.i.  $L^{-1}$  190.08 mg a.i.  $L^{-1}$ . Based on  
286 the observed population control at field rate concentrations, the aphids collected from this field  
287 contained populations grouped into the susceptible, moderately tolerant, and tolerant categories.  
288 Similar observations were made for other locations where more than one population was sampled:  
289 Field 3 contained four *S. avenae* populations comprising those categorised as moderately tolerant  
290 and moderately susceptible; field 9 had three populations comprising those categorised as  
291 susceptible and moderately tolerant; four individuals were collected from field 6 comprising those  
292 categorised as susceptible, moderately tolerant, and tolerant; and three populations were sampled  
293 from field 1 comprising populations categorised into susceptible and moderately tolerant. This  
294 diverse range of susceptibility and tolerance to pyrethroids, including wide variation within the  
295 same sampling locations, is in-line with recent surveys conducted in Ireland (Walsh *et al.*, 2020b)  
296 and China (Gong *et al.*, 2021). However, these studies did not relate insecticide susceptibility or  
297 tolerance to the presence or absence of facultative endosymbionts within the local aphid  
298 populations.

299 In our *R. padi* populations we detected reduced sensitivity to the pyrethroid deltamethrin in one  
300 population. This difference is between the most sensitive aphid population, RP-3 estimated  $EC_{50}$   
301 0.44 mg a.i.  $L^{-1}$ , and population RP-5, estimated to have an increased  $EC_{50}$  of 5.32 mg a.i.  $L^{-1}$ . We  
302 also detected a reduction in the level of population control in RP-5, with only 96% of the aphid  
303 population effectively managed at the field rate concentration of 357 mg a.i.  $L^{-1}$ , compared with  
304 100% population control in RP-3. Our increased  $EC_{50}$  for RP-5 represents the first observation of  
305 reduced sensitivity to pyrethroids in *R. padi* populations collected in Germany. Reduced sensitivity  
306 against pyrethroids has recently been reported in three *R. padi* populations in Australia, these three  
307 populations were estimated to have  $EC_{50}$  values of 15.34, 16.22, and 24.57 mg a.i.  $L^{-1}$  (Umina *et al.*,  
308 2020). These values are at least three-fold higher than the  $EC_{50}$  value estimated for RP-5 and  
309 are associated with a further reduction in effective population control under field rate  
310 concentrations, down to 91% effective control (Umina *et al.*, 2020), compared with 96% control in  
311 RP-5. Recent surveys in Ireland have also detected reduced pyrethroid sensitivity in one *R. padi*  
312 population, where  $EC_{50}$  levels were compared with a susceptible *kdr*-SS *S. avenae* population  
313 (Walsh *et al.*, 2020a). Although we detect reduced sensitivity in *R. padi* in Germany, effective  
314 population control remains relatively high at 96%, thus this should not adversely affect aphid  
315 management strategies or impact crop yields in the immediate term. However, this finding indicates  
316 that resistance to pyrethroids is starting to evolve and, upon the evolution of *kdr*-SR resistance, the  
317 impact on crop yields could become more apparent as conventional control strategies fail. Surveys  
318 should be continued in order to monitor the development of the situation over the coming years  
319 while developing and prioritising the use of alternative strategies for aphid management that do not  
320 rely on resistance-inducing insecticides. In China, decreased sensitivity to pyrethroids was first  
321 detected in populations sampled in 2013 from multiple locations across China, including Xianyang,  
322 Shaaxi Province (Zuo *et al.*, 2016). *Super-kdr*-SR heterozygous resistance against pyrethroids  
323 (shown to be effective against two active ingredients: alpha-cypermethrin and deltamethrin) was  
324 detected six years later from populations collected in 2019 from the same Province (Wang *et al.*,  
325 2020).

326 Aphids are often considered as a single homogeneous population, however it is clear that aphids  
327 can comprise populations with contrasting intra-species diversity. Intra-species diversity in cereal  
328 aphids is associated with genetic diversity and the composition of endosymbiont communities  
329 (Alkhedir *et al.*, 2013; Malloch *et al.*, 2016; Guo *et al.*, 2019; Leybourne *et al.*, 2020a). This intra-  
330 species diversity can affect the aphid phenotype, and there is evidence that this could include  
331 heightened aphid susceptibility to insecticides (Li *et al.*, 2021). In order to examine whether natural  
332 occurrence of facultative endosymbionts influences aphid sensitivity to pyrethroids, we  
333 characterised the facultative endosymbiont community of the 32 aphid populations and related this  
334 to the results of the dose-response assays. We detected facultative endosymbionts in 92% of the  
335 *S. avenae* populations and 57% of the *R. padi* populations. These natural levels of endosymbiont  
336 infection are similar to those reported in previous endosymbiont surveys (Alkhedir *et al.*, 2013;  
337 Łukasik *et al.*, 2013; Fakhour *et al.*, 2018; Guo *et al.*, 2019). Our *S. avenae* populations showed a  
338 high prevalence of *R. insecticola* infection (72%). This is comparable with infection levels detected  
339 in Morocco, 75% *S. avenae* population infection with *R. insecticola* (Fakhour *et al.*, 2018), and  
340 above levels previously observed in *S. avenae* sampled from Germany, 50% *R. insecticola*  
341 infection (Alkhedir *et al.*, 2013). Similarly, *H. defensa* usually occurs at low-to-moderate frequency  
342 in *R. padi* populations, with previous studies reporting infection frequencies between 10-38% (Guo  
343 *et al.*, 2019; Leybourne *et al.*, 2020a), comparable with 29% of *R. padi* populations detected to be  
344 infected with *H. defensa* in our aphid populations. We detected *F. symbiotica* in a small proportion  
345 of our *S. avenae* and *R. padi* populations. *F. symbiotica* can occur at high levels in *A. pisum*  
346 populations (Zytynska & Weisser, 2016) but rarely infects other aphid species, occurring at low  
347 frequencies where it is detected (Łukasik *et al.*, 2013; Zytynska & Weisser, 2016).

348 Although we detected variation in endosymbiont infection frequencies across our populations, with  
349 84% of populations carrying at least one facultative endosymbiont and 9% carrying two facultative  
350 endosymbiont species, we did not detect any link between endosymbiont infection and heightened  
351 susceptibility to insecticides. This is in contrast with recent lab studies, where an association  
352 between endosymbiont infection and heightened insecticide susceptibility has been reported  
353 (Skaljac *et al.*, 2018; Li *et al.*, 2021). Recent research has shown that artificial inoculation with *H.*  
354 *defensa* in the grain aphid *S. miscanthi* increases aphid sensitivity to a range of insecticides at low  
355 concentrations, including neonicotinoids and diamides (Li *et al.*, 2021). Similar observations have  
356 been made in pea aphids (*Acyrtosiphon pisum*) infected with the endosymbiont *S. symbiotica*,  
357 where symbiont-infected aphids were more susceptible to low concentrations of several  
358 insecticides, including carbamates, neonicotinoids, tetrone and tertamic acid derivatives, and  
359 diamides (Skaljac *et al.*, 2018). These studies also show that the EC<sub>50</sub> values are lower for  
360 symbiont-infected aphids compared with aphid populations that do not contain facultative  
361 endosymbiont communities (Skaljac *et al.*, 2018; Li *et al.*, 2021). Although these studies did not  
362 examine the relationship between endosymbiont presence and susceptibility to pyrethroids, they  
363 still showcase a link between endosymbiont infection and heightened susceptibility to insecticide  
364 exposure in aphid populations. However, it should be noted that these were artificially manipulated  
365 populations developed through the endosymbiont removal and infection to establish desired  
366 endosymbiont communities under lab conditions, not comparisons of natural infections (Skaljac *et*  
367 *al.*, 2018; Li *et al.*, 2021). The next stage of research would be to examine this association under  
368 field conditions, and to examine this across a broader range of insecticides, including the important  
369 pyrethroids.

370 One caveat of our study was our lack of a characterised *kdr*-SS homozygous pyrethroid  
371 susceptible reference clone. A susceptible clone can be used as a reference baseline in order to  
372 calculate resistance ratios for each tested population and to act as an internal reference (Walsh *et*  
373 *al.*, 2020a; Wang *et al.*, 2020), although this is not included in every survey (Umina *et al.*, 2020;  
374 Gong *et al.*, 2021). The calculated EC<sub>50</sub> values for our most highly sensitive aphid population for

375 each species, *R. padi* (0.44 mg a.i. L<sup>-1</sup>) and *S. avenae* (0.62 mg a.i. L<sup>-1</sup>), are comparable with the  
376 EC<sub>50</sub> values reported in the susceptible populations used in similar studies, including populations  
377 confirmed to contain the homozygous susceptible *kdr*-SS allele: 0.59 mg a.i. L<sup>-1</sup> in deltamethrin-  
378 susceptible *R. padi* populations (Wang *et al.*, 2020, 2021). Therefore, we are confident that our  
379 detection of decreased pyrethroid sensitivity in *R. padi* population RP-5 and our range of  
380 susceptibilities and tolerance detected in our *S. avenae* populations are comparable with  
381 susceptible clones.

## 382 **Acknowledgements**

383 This project was supported by the Alexander von Humboldt Foundation through a Postdoctoral  
384 Research Fellowship to DJL. The authors would like to thank Alexander Manentzos, Anna-Lena  
385 Heitkamp, Kristina Dauven, Eric Mühlwinkel, Christoph Harms, and Antonia Pahl for assisting with  
386 aphid sampling. The authors would like to thank S Donner and M Beekman (Wageningen  
387 University & Research, The Netherlands) for kindly providing positive endosymbiont DNA samples.

## 388 **Data accessibility**

389 The data that support the findings of this study are available from the corresponding author upon  
390 reasonable request.

## 391 **References**

- 392 Alkhedir, H., Karlovsky, P. & Vidal, S. (2013) Relationship between water soluble carbohydrate  
393 content, aphid endosymbionts and clonal performance of *Sitobion avenae* on Cocksfoot cultivars.  
394 *PLOS ONE*, **8**, e54327.
- 395 Álvarez-Lagazzi, A.P., Cabrera, N., Francis, F. & Ramírez, C.C. (2021) *Bacillus subtilis* (Bacillales,  
396 Bacillaceae) spores affect survival and population growth in the grain aphid *Sitobion avenae*  
397 (Hemiptera, Aphididae) in relation to the presence of the facultative bacterial endosymbiont  
398 *Regiella insecticola* (Enterobacteriales, Enterobacteriaceae). *Journal of Economic Entomology*,  
399 **114**, 2043–2050.
- 400 Asplen, M.K., Bano, N., Brady, C.M., Desneux, N., Hopper, K.R., Malouines, C., *et al.* (2014)  
401 Specialisation of bacterial endosymbionts that protect aphids from parasitoids. *Ecological*  
402 *Entomology*, **39**, 736–739.
- 403 Beekman, M.M., Donner, S.H., Litjens, J.J.H., Dicke, M., Zwaan, B.J., Verhulst, E.C., *et al.* (2022)  
404 Do aphids in Dutch sweet pepper greenhouses carry heritable elements that protect them against  
405 biocontrol parasitoids? *Evolutionary Applications*, **n/a**.
- 406 Cayetano, L., Rothacher, L., Simon, J.-C. & Vorburger, C. (2015) Cheaper is not always worse:  
407 strongly protective isolates of a defensive symbiont are less costly to the aphid host. *Proceedings*  
408 *of the Royal Society B: Biological Sciences*, **282**, 20142333.
- 409 Dedryver, C.-A., Ralec, A. Le & Fabre, F. (2010) The conflicting relationships between aphids and  
410 men: A review of aphid damage and control strategies. *Comptes Rendus Biologies*, **333**, 539–553.
- 411 Dewar, A.M. & Foster, S.P. (2017) Overuse of pyrethroids may be implicated in the recent BYDV  
412 epidemics in cereals. *Outlooks on Pest Management*, **28**, 7–12.
- 413 Douglas, A.E. & Prosser, W.A. (1992) Synthesis of the essential amino acid tryptophan in the pea  
414 aphid (*Acyrtosiphon pisum*) symbiosis. *Journal of Insect Physiology*, **38**, 565–568.
- 415 Emden, H.F. Van & Harrington, R. (2017) *Aphids as crop pests*. Cabi.
- 416 Fakhour, S., Ambroise, J., Renoz, F., Foray, V., Gala, J.-L. & Hance, T. (2018) A large-scale field  
417 study of bacterial communities in cereal aphid populations across Morocco. *FEMS Microbiology*  
418 *Ecology*, **94**, fiy003.
- 419 Finney, D.J. (1952) *Probit analysis: a statistical treatment of the sigmoid response curve*. 2nd edn.  
420 Cambridge university press, Cambridge.

- 421 Foster, S.P., Denholm, I., Rison, J.-L., Portillo, H.E., Margaritopoulos, J. & Slater, R. (2012)  
422 Susceptibility of standard clones and European field populations of the green peach aphid, *Myzus*  
423 *persicae*, and the cotton aphid, *Aphis gossypii* (Hemiptera: Aphididae), to the novel anthranilic  
424 diamide insecticide cyantraniliprole. *Pest Management Science*, **68**, 629–633.
- 425 Foster, S.P., Paul, V.L., Slater, R., Warren, A., Denholm, I., Field, L.M., *et al.* (2014) A mutation  
426 (L1014F) in the voltage-gated sodium channel of the grain aphid, *Sitobion avenae*, is associated  
427 with resistance to pyrethroid insecticides. *Pest Management Science*, **70**, 1249–1253.
- 428 Gong, P., Li, X., Gao, H., Wang, C., Li, M., Zhang, Y., *et al.* (2021) Field evolved resistance to  
429 pyrethroids, neonicotinoids, organophosphates and macrolides in *Rhopalosiphum padi* (Linnaeus)  
430 and *Sitobion avenae* (Fabricius) from China. *Chemosphere*, **269**, 128747.
- 431 Guo, J., Hatt, S., He, K., Chen, J., Francis, F. & Wang, Z. (2017) Nine facultative endosymbionts in  
432 aphids. A review. *Journal of Asia-Pacific Entomology*, **20**, 794–801.
- 433 Guo, J., Liu, X., Poncelet, N., He, K., Francis, F. & Wang, Z. (2019) Detection and geographic  
434 distribution of seven facultative endosymbionts in two *Rhopalosiphum* aphid species.  
435 *MicrobiologyOpen*, **8**, e00817.
- 436 Henry, L.M., Maiden, M.C.J., Ferrari, J. & Godfray, H.C.J. (2015) Insect life history and the  
437 evolution of bacterial mutualism. *Ecology Letters*, **18**, 516–525.
- 438 IRAC. (2016) IRAC susceptibility test method 019 v3.4. URL [https://irac-](https://irac-online.org/methods/aphids-adulnymphs/)  
439 [online.org/methods/aphids-adulnymphs/](https://irac-online.org/methods/aphids-adulnymphs/) [accessed April 2022].
- 440 Jackson, G.E., Malloch, G., McNamara, L. & Little, D. (2020) Grain aphids (*Sitobion avenae*) with  
441 *knockdown resistance (kdr)* to insecticide exhibit fitness trade-offs, including increased vulnerability  
442 to the natural enemy *Aphidius ervi*. *PLOS ONE*, **15**, e0230541.
- 443 Leybourne, D.J., Bos, J.I.B., Valentine, T.A. & Karley, A.J. (2020a) The price of protection: a  
444 defensive endosymbiont impairs nymph growth in the bird cherry-oat aphid, *Rhopalosiphum padi*.  
445 *Insect Science*, **27**, 69–85.
- 446 Leybourne, D.J., Valentine, T.A., Bos, J.I.B. & Karley, A.J. (2020b) A fitness cost resulting from  
447 *Hamiltonella defensa* infection is associated with altered probing and feeding behaviour in  
448 *Rhopalosiphum padi*. *The Journal of Experimental Biology*, **223**, jeb207936.
- 449 Li, Q., Sun, J., Qin, Y., Fan, J., Zhang, Y., Tan, X., *et al.* (2021) Reduced insecticide susceptibility of  
450 the wheat aphid *Sitobion miscanthi* after infection by the secondary bacterial symbiont *Hamiltonella*  
451 *defensa*. *Pest Management Science*, **77**, 1936–1944.
- 452 Liu, X.-D., Lei, H.-X. & Chen, F.-F. (2019) Infection pattern and negative effects of a facultative  
453 endosymbiont on its insect host are environment-dependent. *Scientific Reports*, **9**, 4013.
- 454 Łukasik, P., Dawid, M.A., Ferrari, J. & Godfray, H.C.J. (2013) The diversity and fitness effects of  
455 infection with facultative endosymbionts in the grain aphid, *Sitobion avenae*. *Oecologia*, **173**, 985–  
456 996.
- 457 Luo, C., Monticelli, L.S., Li, D., Ahmed, S.S., Pandharikar, G., Zhao, H., *et al.* (2020) Comparison  
458 of life-history traits and resistance for *Sitobion avenae* (Fabricius) harboring a facultative symbiont.  
459 *Entomologia Generalis*, **40**, 39–47.
- 460 Malloch, G., Pickup, J., Hight, F., Foster, S., Williamson, M. & Fenton, B. (2016) Assessment of  
461 the spread of pyrethroid resistant *Sitobion avenae* in the UK and an update on changes in the  
462 population structure of *Myzus persicae* in Scotland. In *The Dundee Conference: Crop Protection in*  
463 *Northern Britain 2016, 23-24 February 2016, Dundee, UK*. The Association for Crop Protection in  
464 Northern Britain, pp. 223–228.
- 465 McLean, A.H.C. & Godfray, H.C.J. (2015) Evidence for specificity in symbiont-conferred protection  
466 against parasitoids. *Proceedings of the Royal Society B: Biological Sciences*, **282**, 20150977.
- 467 Nancarrow, N., Aftab, M., Hollaway, G., Rodoni, B. & Trębicki, P. (2021) Yield losses caused by  
468 barley yellow dwarf virus-PAV infection in wheat and barley: A three-year field study in South-  
469 Eastern Australia. *Microorganisms*.

- 470 Oliver, K.M., Degnan, P.H., Burke, G.R. & Moran, N.A. (2009) Facultative Symbionts in Aphids and  
471 the Horizontal Transfer of Ecologically Important Traits. *Annual Review of Entomology*, **55**, 247–  
472 266.
- 473 Oliver, K.M. & Higashi, C.H. V. (2019) Variations on a protective theme: *Hamiltonella defensa*  
474 infections in aphids variably impact parasitoid success. *Current Opinion in Insect Science*, **32**, 1–7.
- 475 Oliver, K.M., Russell, J.A., Moran, N.A. & Hunter, M.S. (2003) Facultative bacterial symbionts in  
476 aphids confer resistance to parasitic wasps. *Proceedings of the National Academy of Sciences*,  
477 **100**, 1803–1807.
- 478 Perry, K.L., Kolb, F.L., Sammons, B., Lawson, C., Cisar, G. & Ohm, H. (2000) Yield effects of  
479 barley yellow dwarf virus in soft red winter wheat. *Phytopathology*, **90**, 1043–1048.
- 480 Sasaki, T., Hayashi, H. & Ishikawa, H. (1991) Growth and reproduction of the symbiotic and  
481 aposymbiotic pea aphids, *Acyrtosiphon pisum* maintained on artificial diets. *Journal of Insect*  
482 *Physiology*, **37**, 749–756.
- 483 Skaljic, M., Kirfel, P., Grotmann, J. & Vilcinskis, A. (2018) Fitness costs of infection with *Serratia*  
484 *symbiotica* are associated with greater susceptibility to insecticides in the pea aphid *Acyrtosiphon*  
485 *pisum*. *Pest Management Science*, **74**, 1829–1836.
- 486 Umina, P.A., Reidy-Crofts, J., Babineau, M., Maino, J.L. & Edwards, O.R. (2020) Susceptibility of  
487 the bird cherry-oat aphid, *Rhopalosiphum padi* (Hemiptera: Aphididae), to four insecticides. *Austral*  
488 *Entomology*, **59**, 838–844.
- 489 Vorburger, C., Gehrler, L. & Rodriguez, P. (2010) A strain of the bacterial symbiont *Regiella*  
490 *insecticola* protects aphids against parasitoids. *Biology Letters*, **6**, 109–111.
- 491 Walsh, L., Ferrari, E., Foster, S. & Gaffney, M.T. (2020a) Evidence of pyrethroid tolerance in the  
492 bird cherry-oat aphid *Rhopalosiphum padi* in Ireland. *Outlooks on Pest Management*, **31**, 5–9.
- 493 Walsh, L.E., Schmidt, O., Williamson, M.S. & Gaffney, M.T. (2020b) In-field prevalence of resistant  
494 grain aphid *Sitobion avenae* (Fabricius). *Biology and Environment: Proceedings of the Royal Irish*  
495 *Academy*, **120B**, 29–38.
- 496 Wang, K., Bai, J., Zhao, J., Su, S., Liu, L., Han, Z., *et al.* (2020) Super-kdr mutation M918L and  
497 multiple cytochrome P450s associated with the resistance of *Rhopalosiphum padi* to pyrethroid.  
498 *Pest Management Science*, **76**, 2809–2817.
- 499 Wang, K., Zhao, J.N., Bai, J.Y., Shang, Y.Z., Zhang, S.Q., Hou, Y.F., *et al.* (2021) Pyrethroid  
500 resistance and fitness cost conferred by the super-kdr mutation M918L in *Rhopalosiphum padi*  
501 (Hemiptera: Aphididae). *Journal of Economic Entomology*, **114**, 1789–1795.
- 502 Zuo, Y., Wang, K., Zhang, M., Peng, X., Piñero, J.C. & Chen, M. (2016) Regional susceptibilities of  
503 *Rhopalosiphum padi* (Hemiptera: Aphididae) to ten insecticides. *Florida Entomologist*, **99**, 269–  
504 275.
- 505 Zytynska, S.E., Tighiouart, K. & Frago, E. (2021) Benefits and costs of hosting facultative  
506 symbionts in plant-sucking insects: A meta-analysis. *Molecular Ecology*, **30**, 2483–2494.
- 507 Zytynska, S.E. & Weisser, W.W. (2016) The natural occurrence of secondary bacterial symbionts in  
508 aphids. *Ecological Entomology*, **41**, 13–26.
- 509
- 510
